# Supplementary material for: Limited ATF4 Expression in Degenerating Retinas with Ongoing ER Stress Promotes Photoreceptor Survival in a Mouse Model of Autosomal Dominant Retinitis Pigmentosa
Source: PubMed Central journal article supplement (PMC4856272; doi:10.1371/journal.pone.0154779), 2016-05-04
Supplement: pone.0154779.s004.pdf [file pone.0154779.s004.pdf]

### A. a- and b- wave amplitudes of the photopic and scotopic ERGs (in $\mu\text{V}$ )

Over-expression of ATF4 by sub-retinal AAV2/5 delivery to P15 T17M RHO pups.

| ERG amplitude | AAV2/5-ATF4       | AAV2/5-GFP        | Naïve             |
|---------------|-------------------|-------------------|-------------------|
| a-wave        | 76.06 $\pm$ 7.7   | 128.5 $\pm$ 13.83 | 137.4 $\pm$ 29.14 |
| b-wave        | 339.5 $\pm$ 16.09 | 509 $\pm$ 19.17   | 492.2 $\pm$ 42.5  |

Over-expression of ATF4 by sub-retinal AAV2/5 delivery to P15 C57BL6 pups.

| ERG amplitude | AAV2/5-ATF4       | AAV2/5 GFP        | Naïve             |
|---------------|-------------------|-------------------|-------------------|
| a-wave        | 167.3 $\pm$ 39.28 | 394.5 $\pm$ 29.39 | 395.2 $\pm$ 19.02 |
| b-wave        | 324.3 $\pm$ 93.92 | 686.5 $\pm$ 45.74 | 706.9 $\pm$ 48.57 |

### B.

Western blot analysis of ATF4 over-expressed T17M retinas. : Normalized protein in a.u.

|      | T17M-AAV2/5-GFP  | T17M-AAV2/5-ATF4 |
|------|------------------|------------------|
| ATF4 | 0.204 $\pm$ 0.07 | 0.475 $\pm$ 0.05 |
| CHOP | 0.267 $\pm$ 0.06 | 0.497 $\pm$ 0.05 |

### Caspase-3/7 activity

|        | T17M<br>Injected with<br>AAV2/5-ATF4 | T17M<br>Injected with<br>AAV2/5-GFP | C57BL6<br>Injected with<br>AAV2/5 -ATF4 | C57BL6<br>Injected with<br>AAV2/5 -GFP | Ratio:<br>T17M injections<br>ATF4/GFP | Ratio:<br>C57BL6<br>Injections<br>ATF4/GFP |
|--------|--------------------------------------|-------------------------------------|-----------------------------------------|----------------------------------------|---------------------------------------|--------------------------------------------|
| Csp3/7 | 868.2 $\pm$ 40.6                     | 576.6 $\pm$ 39.86                   | 522.5 $\pm$ 24.43                       | 150.8 $\pm$ 22.63                      | 1.5                                   | 3.48                                       |

### C.

a- and b- wave amplitudes of the photopic and scotopic ERGs (in  $\mu\text{V}$ )

#### Photopic ERG Amplitudes

| Month   | C57BL6            | ATF4 <sup>+/-</sup> | T17M             | T17M<br>ATF4 <sup>+/-</sup> | Ratio:<br>T17M/C57BL6 | Ratio:<br>T17MATF4 <sup>+/-</sup><br>/ T17M | Ratio:<br>T17M<br>ATF4 <sup>+/-</sup><br>/C57BL6 |
|---------|-------------------|---------------------|------------------|-----------------------------|-----------------------|---------------------------------------------|--------------------------------------------------|
| a-wave  |                   |                     |                  |                             |                       |                                             |                                                  |
| 1 month | 27.04 $\pm$ 1.72  | 28.13 $\pm$ 1.87    | 15.33 $\pm$ 2.39 | 28.94 $\pm$ 2.73            | 0.567                 | 1.89                                        | 1.07                                             |
| b-wave  |                   |                     |                  |                             |                       |                                             |                                                  |
| 1 month | 222.2 $\pm$ 10.14 | 246.4 $\pm$ 13.48   | 187.5 $\pm$ 5.78 | 241.0 $\pm$ 6.59            | 0.843                 | 1.28                                        | 1.08                                             |

### Scotopic ERG Amplitudes

| Month | C57BL6 | ATF4 | T17M | T17M ATF4 | Ratio<br>T17M:<br>C57BL6 | Ratio<br>T17M ATF4:<br>T17M | Ratio<br>T17MATF4:<br>C57BL6 |
|-------|--------|------|------|-----------|--------------------------|-----------------------------|------------------------------|
|-------|--------|------|------|-----------|--------------------------|-----------------------------|------------------------------|

#### a-wave

|   |             |             |             |             |       |       |       |
|---|-------------|-------------|-------------|-------------|-------|-------|-------|
| 1 | 313±25.66   | 362.8±22.83 | 137.4±29.14 | 304.3±16.32 | 0.438 | 2.214 | 0.971 |
| 2 | 325.3±15.10 | 363.9±17.23 | 108.5±11.70 | 248.7±12.87 | 0.334 | 2.292 | 0.764 |
| 3 | 329.4±16.19 | 301.3±16.05 | 69.71±9.822 | 150.1±7.099 | 0.212 | 2.153 | 0.457 |

#### b-wave

|   |             |             |             |             |       |       |       |
|---|-------------|-------------|-------------|-------------|-------|-------|-------|
| 1 | 757.5±65.13 | 746.7±42.90 | 492.2±42.5  | 737.5±23.88 | 0.649 | 1.498 | 0.973 |
| 2 | 740.8±17.87 | 759.2±25.99 | 477.2±44.37 | 750.2±33.96 | 0.644 | 1.572 | 1.012 |
| 3 | 731.1±32.87 | 668.5±17.94 | 422±39.54   | 556.1±12.26 | 0.577 | 1.318 | 0.760 |

## D. Superior and inferior ONL thickness

### ONL thickness across the retina measured from optic nerve head (ONH)

| Superior<br>ONL<br>Thickness | C57Bl6 (N=7)        |               |               |               | ATF4 (N=7)    |               |               |               | T17M (N=11)   |               |               |               | T17M ATF4 (N=8) |               |               |               |
|------------------------------|---------------------|---------------|---------------|---------------|---------------|---------------|---------------|---------------|---------------|---------------|---------------|---------------|-----------------|---------------|---------------|---------------|
|                              | microns<br>from ONH | 100           | 200           | 300           | 400           | 100           | 200           | 300           | 400           | 100           | 200           | 300           | 400             | 100           | 200           | 300           |
| P30                          | 63.2±<br>0.49       | 63.7±<br>0.57 | 64.4±<br>0.47 | 63.1±<br>0.4  | 60.7±<br>1.16 | 60.6±<br>1.06 | 61.5±<br>1.89 | 61.4±<br>1.33 | 38.2±<br>1.47 | 37.8±<br>1.31 | 38.7±<br>1.22 | 38.6±<br>2.88 | 52.6±<br>1.85   | 52.6±<br>1.91 | 53.7±<br>1.92 | 52.8±<br>2.03 |
| P60                          | 60.4±<br>0.68       | 61.7±<br>0.48 | 61.5±<br>0.4  | 60.4±<br>0.55 | 59.6±<br>0.81 | 60.4±<br>0.55 | 60.7±<br>0.68 | 60.4±<br>0.98 | 34.3±<br>1.57 | 35.4±<br>1.15 | 35.1±<br>1.55 | 33.8±<br>2.2  | 43.9±<br>1.2    | 44.4±<br>1.19 | 45.6±<br>1.38 | 44.6±<br>1.11 |
| P90                          | 58.4±<br>0.63       | 59.6±<br>0.5  | 59.6±<br>0.5  | 60±<br>0.27   | 58.3±<br>0.59 | 58.5±<br>0.62 | 60.2±<br>0.41 | 59.2±<br>0.61 | 22±<br>1.86   | 21.5±<br>1.61 | 23.1±<br>1.09 | 23.2±<br>1.64 | 42.6±<br>1.75   | 43.5±<br>1.33 | 45.3±<br>1.54 | 42.6±<br>1.42 |

| Inferior ONL Thickness | C57Bl6 (N=7)     |            |           |           | ATF4 (N=7) |           |           |           | T17M (N=11) |           |           |           | T17M ATF4 <sup>+/-</sup> (N=8) |           |           |           |
|------------------------|------------------|------------|-----------|-----------|------------|-----------|-----------|-----------|-------------|-----------|-----------|-----------|--------------------------------|-----------|-----------|-----------|
|                        | microns from ONH | 100        | 200       | 300       | 400        | 100       | 200       | 300       | 400         | 100       | 200       | 300       | 400                            | 100       | 200       | 300       |
| P30                    | 64±0.38          | 64.3±0.36  | 63.1±0.4  | 63.7±0.4  | 62.2±1.08  | 62.2±1.74 | 61.7±0.8  | 61.5±0.83 | 36.8±3      | 38±2.95   | 38.3±2.78 | 38.7±1.43 | 52.9±2.04                      | 54.3±2    | 53±2.05   | 52.6±1.85 |
| P60                    | 60.4±0.68        | 61.7±0.48  | 61.5±0.4  | 60.4±0.55 | 59.6±0.81  | 60.4±0.55 | 60.7±0.68 | 60.4±0.98 | 34.4±1.85   | 35.7±1.31 | 35.4±1.8  | 33.8±1.84 | 44.9±1.33                      | 46±1.26   | 44.4±1.22 | 45.3±1.85 |
| P90                    | 59.3±0.66        | 59.8±0.654 | 59.2±0.93 | 60.3±0.52 | 59.1±0.38  | 60.1±0.30 | 59.2±0.48 | 59.3±0.66 | 21.5±1.16   | 22.6±1.25 | 23.8±1.11 | 22.9±1.22 | 45.1±1.59                      | 45.6±1.91 | 43.3±1.74 | 45.1±1.6  |

**Average ONL thickness in superior and inferior retinas in microns measured by SD-OCT**

| Postnatal day | C57BL6     | ATF4       | T17M       | T17M ATF4  | Ratio T17M: C57BL6 | Ratio T17M ATF4: T17M | Ratio T17MATF4: C57BL6 |
|---------------|------------|------------|------------|------------|--------------------|-----------------------|------------------------|
| P30 Superior  | 63.4±0.209 | 61.2±0.274 | 38.3±0.218 | 52.8±0.102 | 0.604              | 1.378                 | 0.832                  |
| P60 Superior  | 61±0.351   | 60.3±0.232 | 34.6±0.367 | 44.4±0.144 | 0.567              | 1.283                 | 0.727                  |
| P90 Superior  | 59.4±0.416 | 58.8±0.252 | 22.4±0.384 | 43±0.237   | 0.377              | 1.919                 | 0.723                  |
| P30 Inferior  | 64±0.288   | 61.8±0.218 | 37.9±0.4   | 53.4±0.396 | 0.592              | 1.408                 | 0.834                  |
| P60 Inferior  | 61±0.351   | 60.3±0.232 | 34.8±0.428 | 45.5±0.232 | 0.570              | 1.307                 | 0.745                  |
| P90 Inferior  | 59.5±0.279 | 59.6±0.29  | 22.8±0.495 | 45.3±0.128 | 0.381              | 1.986                 | 0.761                  |

## E. UPR associated markers in P30 retinas. qRT-

PCR: Gene expression, fold change

| Genes | C57BL6       | ATF4        | T17M        | T17M ATF4   | Ratio T17M: C57BL6 | Ratio T17M ATF4: T17M | Ratio T17MATF4: C57BL6 |
|-------|--------------|-------------|-------------|-------------|--------------------|-----------------------|------------------------|
| Bip   | 1.128±0.06   | 0.853±0.06  | 1.494±0.25  | 1.565±0.09  | 1.32               | 1.04                  | 1.38                   |
| Hsp90 | 0.962 ± 0.03 | 0.896±0.03  | 0.522±0.07  | 0.94±0.05   | 0.54               | 1.8                   | 0.97                   |
| Atf4  | 1.177±0.05   | 0.543±0.02  | 1.253±0.2   | 0.858±0.07  | 1.06               | 0.68                  | 0.72                   |
| Chop  | 1.231±0.231  | 1.129±0.054 | 2.032±0.210 | 1.511±0.055 | 1.65               | 0.74                  | 1.22                   |

Western blot analysis: Normalized protein in arbitrary units (a.u)

| Proteins | C57BL6      | ATF4        | T17M        | T17M ATF4  | Ratio T17M: C57BL6 | Ratio T17M ATF4: T17M | Ratio T17M ATF4: C57BL6 |
|----------|-------------|-------------|-------------|------------|--------------------|-----------------------|-------------------------|
| pAtf6-50 | 0.106±0.01  | 0.101±0.010 | 0.189±0.01  | 0.130±0.00 | 1.787              | 0.687                 | 1.229                   |
| pPERK    | 0.079±0.03  | 0.055±0.02  | 0.977±0.1   | 0.528±0.07 | 12.36              | 0.54                  | 6.68                    |
| pEIF2    | 1.175±0.15  | 1.433±0.152 | 0.919±0.1   | 0.349±0.02 | 0.782              | 0.379                 | 0.297                   |
| ATF4     | 1.4±0.19    | 0.584±0.04  | 2.55±0.12   | 0.993±0.03 | 1.82               | 0.38                  | 0.7                     |
| CHOP     | 0.037±0.003 | 0.032±0.007 | 0.065±0.002 | 0.037±0.01 | 1.721              | 0.579                 | 1.0                     |
| GADD34   | 0.258±0.05  | 0.220±0.05  | 0.220±0.02  | 0.611±0.15 | 0.880              | 2.911                 | 2.571                   |
| p-p53    | 2.68±0.2    | 2.78±0.4    | 4.21±0.07   | 2.44±0.5   | 1.57               | 0.57                  | 0.91                    |

Caspase-3/7 activity: Luminescence in arbitrary units (a.u)

|        | C57BL6    | ATF4        | T17M        | T17M ATF4 | Ratio T17M: C57BL6 | Ratio T17M ATF4: T17M | Ratio T17M ATF4: C57BL6 |
|--------|-----------|-------------|-------------|-----------|--------------------|-----------------------|-------------------------|
| Csp3/7 | 188±29.59 | 122.5±12.26 | 560.8±49.42 | 186±37.96 | 2.982              | 0.332                 | 0.989                   |

## F. Anti-oxidant proteins

qRT\_PCR: Gene expression, fold change

| Genes | C57BL6      | ATF4        | T17M        | T17M ATF4   | Ratio T17M: C57BL6 | Ratio T17M ATF4: T17M | Ratio T17MATF4: C57BL6 |
|-------|-------------|-------------|-------------|-------------|--------------------|-----------------------|------------------------|
| NRF2  | 1.022±0.104 | 0.759±0.071 | 1.420±0.190 | 0.816±0.035 | 1.389              | 0.574                 | 0.798                  |
| HO-1  | 1.000±0.000 | 1.579±0.252 | 2.210±0.014 | 3.377±0.064 | 2.210              | 1.528                 | 3.378                  |

Western blot analysis: Normalized protein in arbitrary units (a.u)

| Proteins | C57BL6     | ATF4       | T17M       | T17M ATF4 | Ratio T17M: C57BL6 | Ratio T17M ATF4: T17M | Ratio T17MATF4: C57BL6 |
|----------|------------|------------|------------|-----------|--------------------|-----------------------|------------------------|
| p62      | 3.64±0.65  | 3.39±0.31  | 1.26±0.45  | 3.44±0.25 | 0.34               | 2.73                  | 0.94                   |
| NRF2     | 0.386±0.05 | 0.701±0.05 | 0.384±0.04 | 1.22±0.21 | 0.99               | 3.18                  | 3.16                   |
| HO-1     | 0.335±0.03 | 0.251±0.08 | 0.410±0.07 | 0.65±0.01 | 1.22               | 1.58                  | 1.94                   |

## G. Autophagy Proteins

Western blot analysis: Normalized rhodopsin protein in arbitrary units (a.u)

| Proteins | C57BL6    | ATF4      | T17M       | T17M ATF4 | Ratio T17M: C57BL6 | Ratio T17M ATF4: T17M | Ratio T17MATF4: C57BL6 |
|----------|-----------|-----------|------------|-----------|--------------------|-----------------------|------------------------|
| peIF4E   | 7.75±1.17 | 8.97±0.72 | 0.817±0.35 | 4.73±0.99 | 0.10               | 5.78                  | 0.61                   |
| LC3-II   | 4.87±0.52 | 6.82±0.89 | 2.46±0.22  | 5.26±0.88 | 0.50               | 2.13                  | 1.08                   |
| Beclin1  | 2.29±0.32 | 2.96±0.23 | 1.89±0.15  | 3.28±0.19 | 0.82               | 1.73                  | 1.43                   |

## H. Rhodopsin and ER stress induced miRNA-708

qRT-PCR: Gene expression, fold change

| Genes   | C57BL6      | ATF4        | T17M        | T17M ATF4   | Ratio T17M: C57BL6 | Ratio T17M ATF4: T17M | Ratio T17MATF4: C57BL6 |
|---------|-------------|-------------|-------------|-------------|--------------------|-----------------------|------------------------|
| Rho-M   | 1.127±0.111 | 1.072±0.043 | 0.027±0.008 | 0.422±0.009 | 0.024              | 15.856                | 0.375                  |
| Rho-H   |             |             | 0.949±0.025 | 15.16±0.746 |                    | 16.12                 |                        |
| mRNA708 | 1.248±0.140 | 1.373±0.061 | 2.397±0.176 | 1.229±0.089 | 1.921              | 0.513                 | 0.985                  |

Western blot analysis: Normalized rhodopsin protein in arbitrary units (a.u)

| RHO     | C57BL6      | ATF4        | T17M        | T17M ATF4   | Ratio T17M: C57BL6 | Ratio T17M ATF4: T17M | Ratio T17MATF4: C57BL6 |
|---------|-------------|-------------|-------------|-------------|--------------------|-----------------------|------------------------|
| Monomer | 4.508±0.681 | 3.301±0.390 | 0.940±0.133 | 2.320±0.457 | 0.208              | 2.468                 | 0.514                  |
| Dimer   | 3.577±0.457 | 2.162±0.528 | 0.314±0.117 | 1.075±0.580 | 0.087              | 3.423                 | 0.300                  |

## I. List of antibodies and their dilutions

| Protein         | Company                        | Dilution |
|-----------------|--------------------------------|----------|
| BIP             | Santa Cruz                     | 1:500    |
| CHOP            | Santa Cruz                     | 1:500    |
| peIF2α          | Cell Signaling                 | 1:1000   |
| GADD34          | Santa Cruz                     | 1:500    |
| pATF6 (cleaved) | Imaginex                       | 1:500    |
| Rhodopsin 1D4   | University of British Columbia | 1:1000   |
| GFP             | Abcam                          | 1:400    |
| ATF4            | Cell Signaling                 | 1:1000   |
| pPERK           | Cell Signaling                 | 1:1000   |
| p62             | Cell Signaling                 | 1:1000   |
| Beclin1         | Cell Signaling                 | 1:1000   |
| LC3-II          | Cell Signaling                 | 1:1000   |
| NRF2            | Santa Cruz                     | 1:500    |
| HO-1            | Santa Cruz                     | 1:500    |
| p53             | Cell Signaling                 | 1:1000   |
| peIF4E          | Cell Signaling                 | 1:1000   |
